# Supplementary material for: Dietary oil composition differentially modulates intestinal endotoxin transport and postprandial endotoxemia
Source: Springer Nature journal article supplement (doi:10.1186/1743-7075-10-6), 2013-01-10

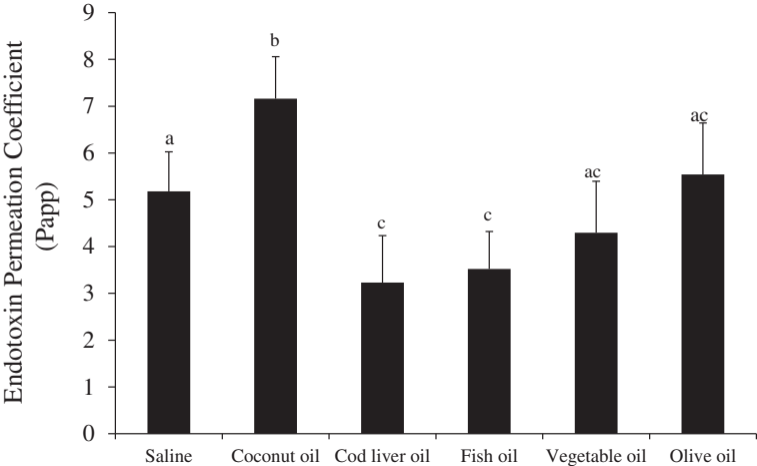

Supplement: 12986_2012_520_MOESM3_ESM.pdf [file 12986_2012_520_MOESM3_ESM.pdf]
